# Supplementary material for: Morphological Characterization and Integrated Transcriptome and Proteome Analysis of Organ Development Defective 1 (odd1) Mutant in Cucumis sativus L
Source: MDPI journal article supplement (doi:10.3390/ijms23105843), 2022-05-23
Supplement: s1 [file s1]

# Supplementary figures and tables

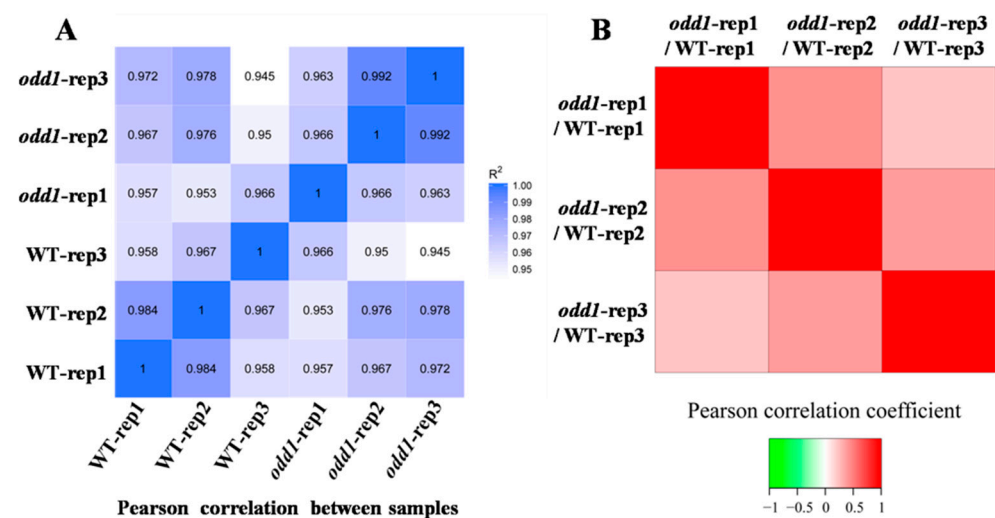

**Figure S1.** Pearson correlation analysis of transcriptomic and proteomic data between all samples, respectively. (A) Pearson correlation analysis of transcriptomic data. (B) Pearson correlation analysis of proteomic data. The color code indicates Pearson correlation coefficient value and the color scale of the heat map ranges from saturated green (value, -1) to saturated red (value, 1).

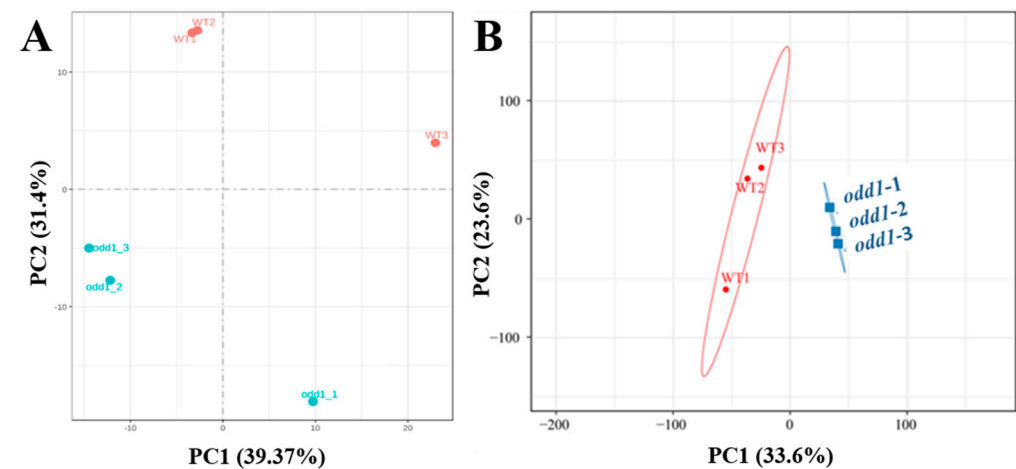

**Figure S2.** Principal component analysis of transcriptomic and proteomic data between all samples, respectively. (A) Principal component analysis at the transcriptome level. (B) Principal component analysis at the proteome level.

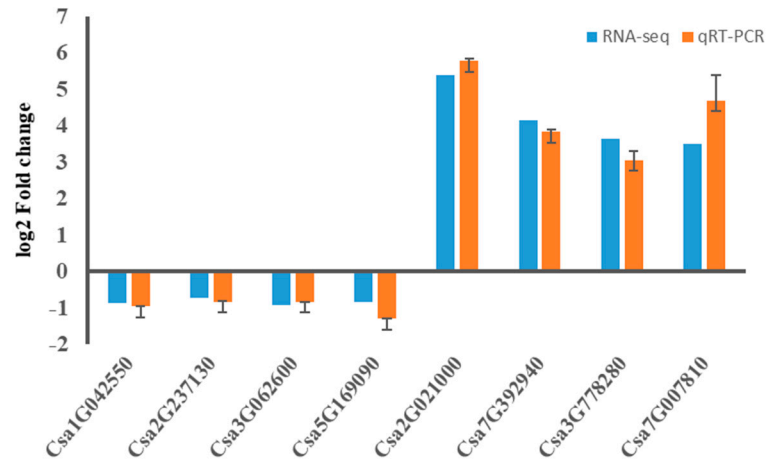

**Figure S3.** qRT-PCR validation of DEGs identified by RNA-seq.

**Transcriptomics** **Proteomics**

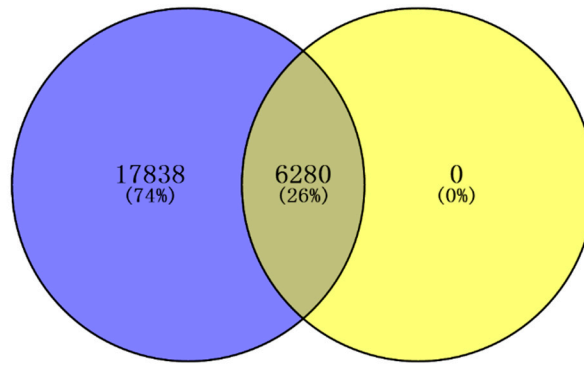

**Figure S4.** Transcriptomics and proteomics identified compared venn diagram.

**Table S1.** The quality of re-sequencing data.

| Sample      | Raw reads | Clean bases | Mapped (%) | Q20 (%) | Q30 (%) | GC content (%) |
|-------------|-----------|-------------|------------|---------|---------|----------------|
| <i>odd1</i> | 48664295  | 45992885    | 92.4       | 95.77   | 90.79   | 37.65          |

**Table S2.** Summary of transcriptome sequencing data.

| Sample            | Raw reads | Clean reads<br>(Clean/All) | Mapped Reads<br>(Mapped/Clean) | Uniquely mapped<br>(Unique/Clean) | Q20 (%) | GC<br>content (%) |
|-------------------|-----------|----------------------------|--------------------------------|-----------------------------------|---------|-------------------|
| WT-rep1           | 56857254  | 54862040(96.49%)           | 52588770 (95.86%)              | 51649382 (94.14%)                 | 97.23   | 42.93             |
| WT-rep2           | 63656560  | 62760600(98.59%)           | 60223314 (95.96%)              | 59122631 (94.20%)                 | 97.11   | 43.16             |
| WT-rep3           | 52118766  | 51169978(98.18%)           | 49175600 (96.10%)              | 48348213 (94.49%)                 | 98.08   | 42.08             |
| <i>odd1</i> -rep1 | 42777848  | 41132430(96.15%)           | 39215014 (95.34%)              | 38549174 (93.72%)                 | 97.85   | 42.00             |
| <i>odd1</i> -rep2 | 51930126  | 51164624(98.53%)           | 49059426 (95.89%)              | 48200934 (94.21%)                 | 97.17   | 42.99             |
| <i>odd1</i> -rep3 | 55159510  | 54155680(98.18%)           | 52063995 (96.14%)              | 51135218 (94.42%)                 | 97.31   | 43.18             |

**Table S3.** Mapped regions distribution in the reference genome.

| Sample            | Intergenic (%) | Exon (%) | Intron (%) |
|-------------------|----------------|----------|------------|
| WT-rep1           | 5.8            | 92.1     | 2.1        |
| WT-rep2           | 6.0            | 92.0     | 2.0        |
| WT-rep3           | 6.9            | 90.7     | 2.4        |
| <i>odd1</i> -rep1 | 6.6            | 91.5     | 1.9        |
| <i>odd1</i> -rep2 | 5.9            | 91.8     | 2.3        |
| <i>odd1</i> -rep3 | 5.8            | 92.0     | 2.2        |

**Table S4.** List of transcription factors that were down-regulated in *odd1* mutant.

| Gene ID                            | Gene description                                                   | log <sub>2</sub> (fold change) | Padj (adjusted P-value) |
|------------------------------------|--------------------------------------------------------------------|--------------------------------|-------------------------|
| <b>AP2-EREBP</b>                   |                                                                    |                                |                         |
| <i>Csa5G155570</i>                 | Dehydration responsive element binding transcription factor 1B     | 5.5528                         | 0.0051271               |
| <i>Csa1G075060</i>                 | Ethylene-responsive transcription factor, putative                 | 2.2624                         | 0.040152                |
| <i>Csa4G630010</i>                 | Ethylene-responsive transcription factor 6                         | 1.8708                         | 0.045959                |
| <i>Csa7G447150</i>                 | Ethylene-responsive transcription factor 6                         | 1.5621                         | 0.0027254               |
| <i>Csa5G612310</i>                 | AP2-like ethylene-responsive transcription factor                  | 1.4571                         | 0.01555                 |
| <i>Csa3G357110</i>                 | Ethylene responsive transcription factor 1a                        | 0.90386                        | 0.008539                |
| <b>C2H2</b>                        |                                                                    |                                |                         |
| <i>Csa3G141860</i>                 | Zinc finger C2H2-type contained transcriptional regulator superman | 3.1593                         | 0.0069897               |
| <i>Csa7G071440</i>                 | Zinc finger C2H2-like contained protein                            | 1.6484                         | 0.044601                |
| <i>Csa7G428260</i>                 | Zinc finger C2H2-type contained protein                            | 1.4741                         | 0.00018434              |
| <b>HSF</b>                         |                                                                    |                                |                         |
| <i>Csa6G169310</i>                 | Heat stress transcription factor A-4a                              | 2.3722                         | 0.0015535               |
| <i>Csa6G490870</i>                 | Heat stress transcription factor                                   | 1.3613                         | 0.0033273               |
| <b>HB</b>                          |                                                                    |                                |                         |
| <a href="#"><i>Csa1G042780</i></a> | WUSCHEL-related homeobox 1                                         | 2.2545                         | 0.0000263               |
| <i>Csa4G043850</i>                 | Homeobox-leucine zipper protein                                    | 1.1622                         | 0.0023245               |
| <b>WRKY</b>                        |                                                                    |                                |                         |
| <i>Csa3G730800</i>                 | WRKY transcription factor 17                                       | 1.9597                         | 0.034386                |
| <i>Csa4G051470</i>                 | WRKY transcription factor 21                                       | 1.8208                         | 0.0056665               |
| <i>Csa2G297180</i>                 | WRKY transcription factor 16                                       | 1.4414                         | 0.00049001              |
| <i>Csa3G119700</i>                 | Putative WRKY transcription factor 30                              | 1.1134                         | 0.013385                |
| <b>bHLH</b>                        |                                                                    |                                |                         |
| <i>Csa3G354520</i>                 | bHLH domain-containing transcription factor                        | 1.8743                         | 0.004005                |
| <b>GRAS</b>                        |                                                                    |                                |                         |
| <i>Csa6G495010</i>                 | GRAS family transcription factor                                   | 1.7225                         | 0.0017211               |
| <i>Csa3G405510</i>                 | Scarecrow-like 1 transcription factor                              | 1.3704                         | 0.004545                |
| <b>MYB</b>                         |                                                                    |                                |                         |

|                    |                                                                           |         |            |
|--------------------|---------------------------------------------------------------------------|---------|------------|
| <i>Csa3G826690</i> | MYB family transcription factor-like protein                              | 0.97522 | 0.0046356  |
| <i>Csa1G033200</i> | MYB transcription factor                                                  | 0.74405 | 0.036368   |
| <b>Others</b>      |                                                                           |         |            |
| <i>Csa2G295940</i> | LOB domain-containing protein                                             | 1.6026  | 0.00000114 |
| <i>Csa1G051590</i> | Squamosa promoter binding protein                                         | 1.1462  | 0.0045259  |
| <i>Csa7G448770</i> | Zinc finger CCCH domain-containing protein                                | 1.0682  | 0.0063682  |
| <i>Csa7G290470</i> | FHA domain containing protein, expressed                                  | 1.0374  | 0.004545   |
| <i>Csa2G223670</i> | Protein tesmin/TSO1-like CXC 2                                            | 0.99262 | 0.011514   |
| <i>Csa3G645940</i> | Protein TIFY                                                              | 0.79419 | 0.035278   |
| <i>Csa3G113370</i> | NAC domain protein                                                        | 0.79032 | 0.014446   |
| <i>Csa6G445000</i> | DNA-binding protein S1FA, putative                                        | 0.75534 | 0.029907   |
| <i>Csa4G051430</i> | High mobility group family, contains high mobility group (HMG) box domain | 0.72699 | 0.025411   |

**Table S5.** List of transcription factors that were up-regulated in *odd1* mutant.

| Gene ID            | Gene description                              | $ \log_2(\text{fold change}) $ | $\text{padj}(\text{adjusted P-value})$ |
|--------------------|-----------------------------------------------|--------------------------------|----------------------------------------|
| <b>bHLH</b>        |                                               |                                |                                        |
| <i>Csa4G312280</i> | bHLH domain-containing transcription factor   | 3.0384                         | 0.001786                               |
| <i>Csa6G011720</i> | Transcription factor bHLH51                   | 1.2575                         | 0.00014729                             |
| <i>Csa1G042340</i> | bHLH domain-containing transcription factor   | 1.1364                         | 0.00079987                             |
| <i>Csa7G428890</i> | Transcription factor bHLH122                  | 0.87739                        | 0.024503                               |
| <b>bZIP</b>        |                                               |                                |                                        |
| <i>Csa2G416070</i> | bZIP transcription factor family protein      | 2.4188                         | 0.0257                                 |
| <i>Csa5G642710</i> | bZIP transcription factor                     | 1.1657                         | 0.024835                               |
| <b>HB</b>          |                                               |                                |                                        |
| <i>Csa5G635430</i> | Homeobox-leucine zipper-like protein          | 2.0763                         | 0.00000000852                          |
| <i>Csa4G645830</i> | Knotted-like homeobox protein                 | 1.5393                         | 0.000000742                            |
| <i>Csa6G501990</i> | Homeobox-leucine zipper protein               | 0.73265                        | 0.037691                               |
| <b>MYB</b>         |                                               |                                |                                        |
| <i>Csa1G042350</i> | MYB transcription factor                      | 1.8445                         | 0.000000219                            |
| <i>Csa7G413890</i> | MYB-like transcription factor MYB 5           | 1.2809                         | 0.007506                               |
| <i>Csa6G040640</i> | Putative MYB transcription factor             | 1.1889                         | 0.00098148                             |
| <i>Csa2G100550</i> | MYB transcription factor                      | 1.0642                         | 0.020392                               |
| <b>ARF</b>         |                                               |                                |                                        |
| <i>Csa6G291920</i> | Auxin response factor 5                       | 1.7374                         | 0.00000000000229                       |
| <i>Csa6G518210</i> | Auxin response factor, putative               | 1.6822                         | 0.00000000000413                       |
| <i>Csa6G524670</i> | Auxin response factor 3                       | 0.65105                        | 0.045938                               |
| <b>WRKY</b>        |                                               |                                |                                        |
| <i>Csa5G223070</i> | WRKY transcription factor, putative           | 1.6167                         | 0.002022                               |
| <i>Csa1G547510</i> | WRKY transcription factor 14-1                | 1.5325                         | 0.037691                               |
| <b>NAC</b>         |                                               |                                |                                        |
| <i>Csa4G629480</i> | NAC domain protein                            | 1.4533                         | 0.00013625                             |
| <i>Csa1G038340</i> | NAC domain-containing protein 21/22, putative | 0.87849                        | 0.0062603                              |
| <i>Csa3G824990</i> | NAC domain protein                            | 0.81129                        | 0.018391                               |

|                    |                                                       |         |            |
|--------------------|-------------------------------------------------------|---------|------------|
| <b>C2H2</b>        |                                                       |         |            |
| <i>Csa1G043020</i> | Putative zinc finger C2H2-type contained protein      | 1.343   | 0.00000877 |
| <i>Csa5G092930</i> | Putative zinc finger C2H2-type contained protein      | 1.1256  | 0.00079907 |
| <b>LOB</b>         |                                                       |         |            |
| <i>Csa3G278920</i> | LOB domain-containing protein                         | 1.2343  | 0.0000894  |
| <i>Csa6G012240</i> | LOB domain-containing protein, putative               | 0.998   | 0.0013866  |
| <b>TCP</b>         |                                                       |         |            |
| <i>Csa1G020890</i> | TCP, transcription factor CYCLOIDEA                   | 1.1351  | 0.013385   |
| <i>Csa1G033030</i> | TCP transcription factor, putative                    | 0.82854 | 0.024668   |
| <b>AUX/IAA</b>     |                                                       |         |            |
| <i>Csa7G378520</i> | Auxin-responsive protein                              | 1.129   | 0.0032235  |
| <i>Csa1G397130</i> | Auxin-responsive protein                              | 1.032   | 0.001255   |
| <i>Csa3G143570</i> | Auxin-responsive protein                              | 0.72205 | 0.020911   |
| <b>Others</b>      |                                                       |         |            |
| <i>Csa6G040600</i> | GRAS, putative nodulation signaling pathway 2 protein | 1.4767  | 0.00049001 |
| <i>Csa3G904140</i> | Two-component response regulator-like protein         | 1.2454  | 0.0062603  |
| <i>Csa1G043000</i> | G2-like                                               | 1.0396  | 0.0057619  |
| <i>Csa6G039540</i> | C2C2-CO-like, CONSTANS-like zinc finger protein       | 0.94739 | 0.035103   |
| <i>Csa6G432270</i> | SRS, short internode related sequence                 | 0.88733 | 0.0066296  |
| <i>Csa3G751470</i> | GRF, putative growth-regulating factor                | 0.84733 | 0.029301   |
| <i>Csa6G091830</i> | AP2-EREBP, ethylene-responsive transcription factor   | 0.71479 | 0.041473   |

---

**Table S6.** Primers for qRT-PCR.

| Primer name   | Sequence (5'-3')       |
|---------------|------------------------|
| Csa1G042550-F | GCCAGGCTAGAAGCAGAAC    |
| Csa1G042550-R | TGCTGGTCCTCCTCAAGTTT   |
| Csa3G062600-F | GAGACACTGCTGAAGCTG     |
| Csa3G062600-R | CAGTTTGCTCTCTGCAAGGT   |
| Csa2G237130-F | GAGATTGATAGAAAGCAAGCTG |
| Csa2G237130-R | TGGCATGGTGGTGAATACG    |
| Csa5G169090-F | AGTGACCGGCAGATGGT      |
| Csa5G169090-R | GATGCCAAAGCTCCAACA     |
| Csa2G021000-F | CGATCAGTGCCCATTTTACGT  |
| Csa2G021000-R | CGTGTTTCAAGCGTTCACCA   |
| Csa7G392940-F | TGACATCGCCACTCGATTCC   |
| Csa7G392940-R | GGAATCGAGTGGCGATGTCA   |
| Csa7G007810-F | CCGCAAATACTCAACGTT     |
| Csa7G007810-R | TTTGATGAGATCCATATC     |
| Csa3G778280-F | CAACTACTTGGCAAAGGAG    |
| Csa3G778280-R | GTTTGATGCCGAGGAAGACA   |
